# Supplementary material for: Mechanistic Insight into the Elastin Degradation Process by the Metalloprotease Myroilysin from the Deep-Sea Bacterium Myroides profundi D25
Source: PubMed Central journal article supplement (PMC4377995; doi:10.3390/md13031481), 2015-03-18
Supplement: marinedrugs-13-01481-s001.pdf [file marinedrugs-13-01481-s001.pdf]

## Supplementary Information

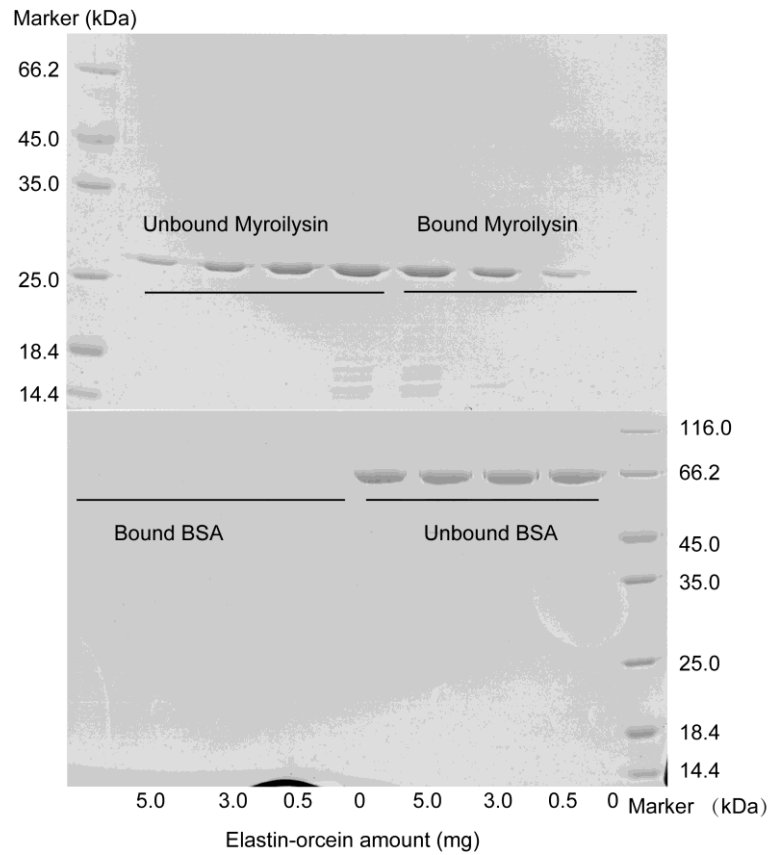

**Figure S1.** SDS-PAGE analysis of the binding ability of myroilysin to insoluble elastin. BSA was used as a negative control. The unbound and bound fractions were analyzed by 12.5% SDS-PAGE. For protein staining, the gels were stained with 1.0% (wt/vol) Coomassie brilliant blue R-250. (Full-length gels of Figure 1A).

**Table S1.** The determined molecular masses and sequences of the 93 peptides released from bovine elastin fibers by myroilysin.

| Number | Position | Sequence Identified <sup>a</sup> | Score | Expect Value           | Error (ppm) | m/z      | Mr (expt) (Da) | Mr (calc) (Da) |
|--------|----------|----------------------------------|-------|------------------------|-------------|----------|----------------|----------------|
| 1      | 33–52    | A.VPGGVPGGVFFPGAGLGGLG.V         | 42.68 | 0.002                  | −0.41       | 856.4616 | 1710.9087      | 1710.9094      |
| 2      | 33–54    | A.VPGGVPGGVFFPGAGLGGLGVG.G       | 30.06 | 0.0084                 | 0.11        | 934.507  | 1866.9995      | 1866.9993      |
| 3      | 37–52    | G.VPGGVFFPGAGLGGLG.V             | 49.13 | 0.00056                | −0.14       | 701.3798 | 1400.7451      | 1400.7453      |
| 4      | 37–54    | G.VPGGVFFPGAGLGGLGVG.G           | 48.47 | 0.0009                 | −0.26       | 779.4247 | 1556.8348      | 1556.8352      |
| 5      | 40–52    | G.GVFFPGAGLGGLG.V                | 49.52 | 0.00084                | −0.87       | 574.8081 | 1147.6017      | 1147.6026      |
| 6      | 40–49    | G.GVFFPGAGLG.G                   | 46.45 | 0.023                  | 1.85        | 461.2459 | 920.4773       | 920.4756       |
| 7      | 41–52    | G.VFFPGAGLGGLG.V                 | 58.45 | 4.90 × 10 <sup>5</sup> | −0.28       | 546.2977 | 1090.5809      | 1090.5812      |
| 8      | 41–50    | G.VFFPGAGLGG.L                   | 51.9  | 0.0008                 | 0.76        | 461.2454 | 920.4763       | 920.4756       |
| 9      | 41–49    | G.VFFPGAGLG.G                    | 57.75 | 0.0012                 | 0.00        | 432.7343 | 863.4541       | 863.4542       |
| 10     | 41–51    | G.VFFPGAGLGGL.G                  | 42.54 | 0.0065                 | 0.97        | 517.7876 | 1033.5606      | 1033.5597      |
| 11     | 42–52    | V.FFPAGLGGLG.V                   | 55.84 | 0.00037                | −0.91       | 496.7632 | 991.5118       | 991.5127       |
| 12     | 112–127  | G.AAGLVGGIGGVGGLG.V              | 45.31 | 0.037                  | −2.06       | 606.3395 | 1210.6645      | 1210.667       |
| 13     | 113–129  | A.AGLVGGIGGVGGLGVS.T             | 28.34 | 0.035                  | −0.38       | 663.8722 | 1325.7298      | 1325.7304      |
| 14     | 114–127  | A.GLVGGIGGVGGLG.V                | 74.1  | 3.30E-05               | −0.09       | 535.3036 | 1068.5927      | 1068.5928      |
| 15     | 115–127  | G.LGVGGIGGVGGLG.V                | 70.19 | 7.40E-05               | −0.30       | 506.7928 | 1011.571       | 1011.5713      |
| 16     | 115–129  | G.LGVGGIGGVGGLGVS.T              | 49.79 | 0.0013                 | −2.25       | 599.8418 | 1197.669       | 1197.6718      |
| 17     | 115–126  | G.LGVGGIGGVGGL.G                 | 52.13 | 0.0041                 | 0.94        | 478.2826 | 954.5507       | 954.5499       |
| 18     | 117–128  | G.VGGIGGVGGLGV.S                 | 65.07 | 0.00023                | −0.11       | 471.2744 | 940.5341       | 940.5342       |
| 19     | 117–127  | G.VGGIGGVGGLG.V                  | 64.13 | 0.00042                | 0.12        | 421.7402 | 841.4659       | 841.4658       |
| 20     | 117–129  | G.VGGIGGVGGLGVS.T                | 64.29 | 0.00043                | 0.00        | 514.7904 | 1027.5663      | 1027.5663      |
| 21     | 117–132  | G.VGGIGGVGGLGVSTGA.V             | 46.05 | 0.0014                 | 1.11        | 629.3442 | 1256.6739      | 1256.6725      |
| 22     | 117–137  | G.VGGIGGVGGLGVSTGAVVPQL.G        | 22.81 | 0.029                  | −0.28       | 897.5094 | 1793.0042      | 1793.0048      |
| 23     | 120–132  | G.IGGVGLGVSTGA.V                 | 60.98 | 0.00056                | −0.38       | 522.7877 | 1043.5608      | 1043.5612      |
| 24     | 120–131  | G.IGGVGLGVSTG.A                  | 35.2  | 0.013                  | 0.10        | 487.2693 | 972.5241       | 972.524        |
| 25     | 120–130  | G.IGGVGLGVST.G                   | 44.28 | 0.034                  | 0.44        | 458.7588 | 915.503        | 915.5026       |
| 26     | 153–170  | G.VGLPGVYPPGGVLPAGAR.F           | 27.65 | 0.037                  | −0.73       | 826.959  | 1651.9034      | 1651.9046      |
| 27     | 155–178  | G.LPGVYPPGGVLPAGARFPGIGVLP.G     | 31.29 | 0.0094                 | −0.53       | 1131.143 | 2260.2721      | 2260.2732      |
| 28     | 162–178  | G.GVLPAGARFPGIGVLP.G             | 53.11 | 0.0032                 | −0.44       | 789.4614 | 1576.9083      | 1576.909       |

Table S1. Cont.

|    |         |                                          |       |        |       |          |           |           |
|----|---------|------------------------------------------|-------|--------|-------|----------|-----------|-----------|
| 29 | 163–173 | G.VLPGAGARFPG.I                          | 47.9  | 0.0018 | −0.19 | 521.2955 | 1040.5765 | 1040.5767 |
| 30 | 163–178 | G.VLPGAGARFPGIGVLP.G                     | 36.78 | 0.043  | −0.26 | 760.9508 | 1519.8871 | 1519.8875 |
| 31 | 168–183 | A.GARFPGIGVLPGVPTG.A                     | 47.09 | 0.0075 | 1.34  | 747.926  | 1493.8375 | 1493.8355 |
| 32 | 168–184 | A.GARFPGIGVLPGVPTGA.G                    | 42.85 | 0.011  | −1.47 | 783.4424 | 1564.8703 | 1564.8726 |
| 33 | 168–177 | A.GARFPGIGVL.P                           | 43.23 | 0.046  | 0.71  | 493.7931 | 985.5716  | 985.5709  |
| 34 | 168–178 | A.GARFPGIGVLP.G                          | 41.37 | 0.05   | 0.09  | 542.3192 | 1082.6237 | 1082.6237 |
| 35 | 339–368 | G.VPGVGVPGVGVPGVGVPGVGVPGVGVPGVGV.V      | 48.68 | 0.011  | −0.12 | 825.4758 | 2473.4055 | 2473.4058 |
| 36 | 344–373 | G.VPGVGVPGVGVPGVGVPGVGVPGVGVPGVGVPGVGV.V | 48.68 | 0.011  | −0.12 | 825.4758 | 2473.4055 | 2473.4058 |
| 37 | 349–378 | G.VPGVGVPGVGVPGVGVPGVGVPGVGVPGVGVPGVGV.V | 48.68 | 0.011  | −0.12 | 825.4758 | 2473.4055 | 2473.4058 |
| 38 | 354–383 | G.VPGVGVPGVGVPGVGVPGVGVPGVGVPGVGVPGVGV.V | 48.68 | 0.011  | −0.12 | 825.4758 | 2473.4055 | 2473.4058 |
| 39 | 359–388 | G.VPGVGVPGVGVPGVGVPGVGVPGVGVPGVGVPGVGV.V | 48.68 | 0.011  | −0.12 | 825.4758 | 2473.4055 | 2473.4058 |
| 40 | 339–353 | G.VPGVGVPGVGVPGVGV.V                     | 35.47 | 0.018  | −2.25 | 623.86   | 1245.7054 | 1245.7082 |
| 41 | 344–358 | G.VPGVGVPGVGVPGVGV.V                     | 35.47 | 0.018  | −2.25 | 623.86   | 1245.7054 | 1245.7082 |
| 42 | 349–363 | G.VPGVGVPGVGVPGVGV.V                     | 35.47 | 0.018  | −2.25 | 623.86   | 1245.7054 | 1245.7082 |
| 43 | 354–368 | G.VPGVGVPGVGVPGVGV.V                     | 35.47 | 0.018  | −2.25 | 623.86   | 1245.7054 | 1245.7082 |
| 44 | 359–373 | G.VPGVGVPGVGVPGVGV.V                     | 35.47 | 0.018  | −2.25 | 623.86   | 1245.7054 | 1245.7082 |
| 45 | 364–378 | G.VPGVGVPGVGVPGVGV.V                     | 35.47 | 0.018  | −2.25 | 623.86   | 1245.7054 | 1245.7082 |
| 46 | 369–383 | G.VPGVGVPGVGVPGVGV.V                     | 35.47 | 0.018  | −2.25 | 623.86   | 1245.7054 | 1245.7082 |
| 47 | 374–388 | G.VPGVGVPGVGVPGVGV.V                     | 35.47 | 0.018  | −2.25 | 623.86   | 1245.7054 | 1245.7082 |
| 48 | 339–361 | G.VPGVGVPGVGVPGVGVPGVGVPGVGV.V           | 18.2  | 0.026  | −1.42 | 637.0342 | 1908.0807 | 1908.0834 |
| 49 | 344–366 | G.VPGVGVPGVGVPGVGVPGVGVPGVGV.V           | 18.2  | 0.026  | −1.42 | 637.0342 | 1908.0807 | 1908.0834 |
| 50 | 349–371 | G.VPGVGVPGVGVPGVGVPGVGVPGVGVPGVGV.V      | 18.2  | 0.026  | −1.42 | 637.0342 | 1908.0807 | 1908.0834 |
| 51 | 354–376 | G.VPGVGVPGVGVPGVGVPGVGVPGVGVPGVGV.V      | 18.2  | 0.026  | −1.42 | 637.0342 | 1908.0807 | 1908.0834 |
| 52 | 359–381 | G.VPGVGVPGVGVPGVGVPGVGVPGVGVPGVGV.V      | 18.2  | 0.026  | −1.42 | 637.0342 | 1908.0807 | 1908.0834 |
| 53 | 364–386 | G.VPGVGVPGVGVPGVGVPGVGVPGVGVPGVGV.V      | 18.2  | 0.026  | −1.42 | 637.0342 | 1908.0807 | 1908.0834 |
| 54 | 369–391 | G.VPGVGVPGVGVPGVGVPGVGVPGVGVPGVGV.V      | 18.2  | 0.026  | −1.42 | 637.0342 | 1908.0807 | 1908.0834 |
| 55 | 339–363 | G.VPGVGVPGVGVPGVGVPGVGVPGVGVPGVGV.V      | 42.83 | 0.045  | −0.78 | 689.0645 | 2064.1717 | 2064.1733 |
| 56 | 344–368 | G.VPGVGVPGVGVPGVGVPGVGVPGVGVPGVGV.V      | 42.83 | 0.045  | −0.78 | 689.0645 | 2064.1717 | 2064.1733 |
| 57 | 349–373 | G.VPGVGVPGVGVPGVGVPGVGVPGVGVPGVGV.V      | 42.83 | 0.045  | −0.78 | 689.0645 | 2064.1717 | 2064.1733 |



Table S1. Cont.

|    |         |                        |       |          |       |          |           |           |
|----|---------|------------------------|-------|----------|-------|----------|-----------|-----------|
| 86 | 527–538 | G.IGLGPGGVIGAG.V       | 53.34 | 0.0023   | 0.52  | 484.2825 | 966.5504  | 966.5498  |
| 87 | 651–667 | A.AQFGLGGVGGGLGVGGLG.A | 42.13 | 0.0052   | −0.99 | 708.385  | 1414.7555 | 1414.7569 |
| 88 | 652–667 | A.QFGLGGVGGGLGVGGLG.A  | 56.99 | 0.00075  | −1.27 | 672.8663 | 1343.7181 | 1343.7198 |
| 89 | 653–662 | Q.FGLGGVGGGLG.V        | 44.21 | 0.044    | −0.48 | 417.2292 | 832.4439  | 832.4443  |
| 90 | 654–667 | F.GLGGVGGGLGVGGLG.A    | 91.48 | 7.60E-07 | 0.66  | 535.304  | 1068.5935 | 1068.5928 |
| 91 | 654–668 | F.GLGGVGGGLGVGGLGA.V   | 71.86 | 3.40E-05 | 0.18  | 570.8223 | 1139.6301 | 1139.6299 |
| 92 | 655–667 | G.LGGVGGGLGVGGLG.A     | 83.83 | 3.00E-06 | 0.49  | 506.7932 | 1011.5719 | 1011.5713 |
| 93 | 694–707 | G.LGGVLGAGQPFPIG.G     | 29.88 | 0.02     | −1.09 | 641.8607 | 1281.7068 | 1281.7081 |

<sup>a</sup>The sequence of each peptide was determined by high resolution LC/MS analysis and MASCOT MS/MS Ion Research tools. The sequences in red are those appearing repeatedly in bovine tropoelastin.

**Table S2.** The determined molecular masses and sequences of the 88 peptides released from recombinant human tropoelastin by myroilysin.

| Number | Position | Sequence Identified <sup>b</sup>           | Score | Expect Value | Error (ppm) | m/z      | Mr (expt) (Da) | Mr (calc) (Da) |
|--------|----------|--------------------------------------------|-------|--------------|-------------|----------|----------------|----------------|
| 1      | 33–69    | A.IPGGVPGGVFYPGAGLGGALGGGALGPGGKPLKPVPGG.L | 33.72 | 0.00076      | −0.41       | 1065.927 | 3194.7592      | 3194.7605      |
| 2      | 51–69    | A.LGGGALGPGGKPLKPVPGG.L                    | 61.3  | 7.40E-07     | −0.86       | 814.977  | 1627.9395      | 1627.941       |
| 3      | 51–65    | A.LGGGALGPGGKPLK.P                         | 49.7  | 1.10E-05     | −1.90       | 659.8945 | 1317.7744      | 1317.7769      |
| 4      | 51–68    | A.LGGGALGPGGKPLKPVPG.G                     | 32.75 | 0.00053      | −0.06       | 786.467  | 1570.9194      | 1570.9195      |
| 5      | 51–67    | A.LGGGALGPGGKPLKVP.G                       | 31.03 | 0.00079      | −2.97       | 757.954  | 1513.8935      | 1513.8981      |
| 6      | 52–67    | L.GGGALGPGGKPLKVP.G                        | 28.93 | 0.0013       | −1.71       | 701.4131 | 1400.8116      | 1400.814       |
| 7      | 52–69    | L.GGGALGPGGKPLKPVPGG.L                     | 28.46 | 0.0023       | 0.92        | 758.4365 | 1514.8584      | 1514.8569      |
| 8      | 52–65    | L.GGGALGPGGKPLK.P                          | 23.14 | 0.0049       | −1.83       | 402.5708 | 1204.6906      | 1204.6928      |
| 9      | 53–65    | G.GGALGPGGKPLK.P                           | 55.73 | 2.70E-06     | 0.09        | 574.843  | 1147.6715      | 1147.6713      |
| 10     | 53–67    | G.GGALGPGGKPLKVP.G                         | 52.27 | 5.90E-06     | −1.41       | 672.9026 | 1343.7906      | 1343.7925      |
| 11     | 53–69    | G.GGALGPGGKPLKPVPGG.L                      | 51.17 | 7.60E-06     | −1.37       | 729.924  | 1457.8335      | 1457.8355      |
| 12     | 53–62    | G.GGALGPGGKPL.L                            | 38.97 | 0.00013      | −0.37       | 405.7269 | 809.4392       | 809.4396       |
| 13     | 53–63    | G.GGALGPGGKPL.K                            | 36.36 | 0.00023      | −0.65       | 462.2688 | 922.523        | 922.5236       |
| 14     | 53–68    | G.GGALGPGGKPLKPVPG.G                       | 26.17 | 0.0024       | −0.43       | 467.9451 | 1400.8134      | 1400.814       |
| 15     | 53–64    | G.GGALGPGGKPLK.P                           | 17.63 | 0.017        | −0.10       | 526.3165 | 1050.6185      | 1050.6186      |
| 16     | 54–69    | G.GALGPGGKPLKPVPGG.L                       | 52.61 | 5.50E-06     | −0.50       | 701.4139 | 1400.8133      | 1400.814       |
| 17     | 54–67    | G.GALGPGGKPLKVP.G                          | 33.09 | 0.00049      | −1.32       | 644.392  | 1286.7694      | 1286.7711      |
| 18     | 54–65    | G.GALGPGGKPLK.P                            | 31.92 | 0.00064      | −2.38       | 546.3309 | 1090.6473      | 1090.6499      |
| 19     | 54–63    | G.GALGPGGKPL.K                             | 24.81 | 0.0033       | 0.12        | 433.7584 | 865.5023       | 865.5022       |
| 20     | 55–65    | G.ALGPGGKPLK.P                             | 52.66 | 5.40E-06     | −1.06       | 517.8209 | 1033.6273      | 1033.6284      |
| 21     | 55–68    | G.ALGPGGKPLKPVPG.G                         | 52.02 | 6.30E-06     | −1.40       | 644.3919 | 1286.7693      | 1286.7711      |
| 22     | 55–67    | G.ALGPGGKPLKVP.G                           | 41.01 | 7.90E-05     | −2.68       | 615.8804 | 1229.7463      | 1229.7496      |
| 23     | 55–63    | G.ALGPGGKPL.K                              | 38.12 | 0.00015      | −1.24       | 405.2471 | 808.4796       | 808.4807       |
| 24     | 55–69    | G.ALGPGGKPLKPVPGG.L                        | 18.44 | 0.014        | −0.15       | 448.938  | 1343.7923      | 1343.7925      |
| 25     | 56–65    | A.LGPGGKPLK.P                              | 42.72 | 5.30E-05     | 0.10        | 482.303  | 962.5914       | 962.5913       |
| 26     | 56–69    | A.LGPGGKPLKPVPGG.L                         | 41.79 | 6.60E-05     | −1.57       | 637.384  | 1272.7534      | 1272.7554      |
| 27     | 56–67    | A.LGPGGKPLKVP.G                            | 37.22 | 0.00019      | −1.81       | 580.3625 | 1158.7104      | 1158.7125      |
| 28     | 56–63    | A.LGPGGKPL.K                               | 17.12 | 0.019        | 0.41        | 369.7292 | 737.4438       | 737.4436       |

Table S2. Cont.

|    |         |                                                                    |       |          |       |          |           |           |
|----|---------|--------------------------------------------------------------------|-------|----------|-------|----------|-----------|-----------|
| 29 | 57–69   | L.GPGGKPLKVPVGG.L                                                  | 49.02 | 1.30E-05 | −0.95 | 580.8424 | 1159.6703 | 1159.6714 |
| 30 | 57–67   | L.GPGGKPLKVPV.G                                                    | 42.55 | 5.60E-05 | 0.57  | 523.8218 | 1045.629  | 1045.6284 |
| 31 | 57–65   | L.GPGGKPLKP.V                                                      | 39.87 | 0.0001   | 0.47  | 425.7611 | 849.5077  | 849.5072  |
| 32 | 57–68   | L.GPGGKPLKVPVPG.G                                                  | 18.29 | 0.015    | −1.09 | 368.5569 | 1102.6487 | 1102.6499 |
| 33 | 58–67   | G.PGGKPLKVPV.G                                                     | 34.66 | 0.00034  | 0.10  | 495.3108 | 988.607   | 988.6069  |
| 34 | 58–69   | G.PGGKPLKVPVGG.L                                                   | 30.68 | 0.00086  | −0.09 | 368.5572 | 1102.6497 | 1102.6499 |
| 35 | 58–65   | G.PGGKPLKP.V                                                       | 18.66 | 0.014    | −0.13 | 397.2501 | 792.4856  | 792.4858  |
| 36 | 59–69   | P.GGKPLKVPVGG.L                                                    | 20.84 | 0.0082   | −1.09 | 503.8053 | 1005.596  | 1005.5971 |
| 37 | 60–69   | G.GKPLKVPVGG.L                                                     | 23.31 | 0.0047   | −2.95 | 475.2937 | 948.5728  | 948.5757  |
| 38 | 60–67   | G.GKPLKVPV.G                                                       | 13.95 | 0.04     | −0.36 | 418.2735 | 834.5324  | 834.5327  |
| 39 | 61–67   | G.KPLKVPV.G                                                        | 37.17 | 0.00019  | −0.77 | 389.7626 | 777.5106  | 777.5112  |
| 40 | 61–69   | G.KPLKVPVGG.L                                                      | 32.38 | 0.00058  | −0.11 | 446.7843 | 891.554   | 891.5542  |
| 41 | 61–68   | G.KPLKVPVPG.G                                                      | 26.97 | 0.002    | 0.36  | 418.2738 | 834.533   | 834.5327  |
| 42 | 104–157 | Y.KAAKAGAGLGGVPGVGGGLGVSAGAVVPQPGAGVKPGKVPVGGVLP<br>GVYPPGGVLP.G.A | 16.54 | 0.043    | 0.36  | 676.9515 | 4731.6094 | 4731.6077 |
| 43 | 105–122 | K.AAKAGAGLGGVPGVGGGLG.V                                            | 29.8  | 0.0016   | −1.56 | 704.8979 | 1407.7812 | 1407.7834 |
| 44 | 114–122 | G.GVPGVGGGLG.V                                                     | 40.64 | 0.00017  | 0.42  | 356.7032 | 711.3918  | 711.3916  |
| 45 | 656–664 | L.GVPGVGGGLG.G                                                     | 40.64 | 0.00017  | 0.42  | 356.7032 | 711.3918  | 711.3916  |
| 46 | 126–134 | A.GAVVPQPGA.G                                                      | 17.37 | 0.018    | 0.13  | 398.2217 | 794.4287  | 794.4287  |
| 47 | 128–166 | A.VVPQPGAGVKPGKVPVGGVLPVPGVYPPGGVLPGARFPVGGVLP.P                   | 19.27 | 0.035    | −3.47 | 1248.024 | 3741.0489 | 3741.0619 |
| 48 | 141–159 | K.VPGVGLPGVYPPGGVLPGAR.F                                           | 35.5  | 0.00051  | −0.97 | 881.5033 | 1760.992  | 1760.9938 |
| 49 | 141–178 | K.VPGVGLPGVYPPGGVLPGARFPVGGVLPVPGVPTGAGVKPK.A                      | 27.25 | 0.002    | −0.74 | 880.7599 | 3519.0105 | 3519.013  |
| 50 | 146–153 | G.LPGVYPPGG.V                                                      | 35.07 | 0.00047  | −0.79 | 380.2051 | 758.3957  | 758.3963  |
| 51 | 146–159 | G.LPGVYPPGGVLPGAR.F                                                | 21.81 | 0.0066   | 0.52  | 676.8882 | 1351.7619 | 1351.7612 |
| 52 | 148–156 | P.GVYPPGGVLP.G                                                     | 16.82 | 0.033    | −0.23 | 429.7395 | 857.4645  | 857.4647  |
| 53 | 157–178 | P.GARFPVGGVLPVPGVPTGAGVKPK.A                                       | 15.29 | 0.03     | 1.26  | 516.0553 | 2060.1921 | 2060.1895 |
| 54 | 160–178 | R.FPGVGLPGVPTGAGVKPK.A                                             | 45.62 | 2.70E-05 | −0.45 | 889.0218 | 1776.029  | 1776.0298 |
| 55 | 188–196 | A.GIPGVGPF.G                                                       | 27.31 | 0.0021   | −0.13 | 400.7187 | 799.4228  | 799.4229  |
| 56 | 189–196 | G.IPGVGPFG.G                                                       | 24.02 | 0.0048   | −1.08 | 372.2076 | 742.4006  | 742.4014  |

Table S2. Cont.

|    |         |                                   |       |          |       |          |           |           |
|----|---------|-----------------------------------|-------|----------|-------|----------|-----------|-----------|
| 57 | 206–212 | G.YPIKAPK.L                       | 14.61 | 0.035    | 0.12  | 408.7526 | 815.4906  | 815.4905  |
| 58 | 210–218 | K.APKLPGGYG.L                     | 35.13 | 0.00048  | 0.23  | 430.2374 | 858.4602  | 858.4599  |
| 59 | 213–222 | K.LPGGYGLPYT.T                    | 15.37 | 0.032    | −2.00 | 527.2651 | 1052.5157 | 1052.5179 |
| 60 | 242–254 | K.AGYPTGTGVGPQA.A                 | 40.41 | 0.00013  | −0.85 | 588.2877 | 1174.5609 | 1174.5619 |
| 61 | 289–303 | A.IPGIGGIAGVGPAA.A                | 33.43 | 0.00045  | −0.32 | 625.8586 | 1249.7026 | 1249.703  |
| 62 | 321–329 | A.GLVPGGPGF.G                     | 40.32 | 0.00011  | −0.25 | 400.7186 | 799.4226  | 799.4229  |
| 63 | 322–329 | G.LVPGGPGF.G                      | 53    | 6.00E-06 | −0.40 | 372.2078 | 742.4011  | 742.4014  |
| 64 | 350–357 | A.GIPVPGA.G                       | 34.77 | 0.00033  | −0.56 | 355.2156 | 708.4167  | 708.417   |
| 65 | 350–358 | A.GIPVPGAG.I                      | 26.09 | 0.0036   | −0.13 | 383.7265 | 765.4384  | 765.4385  |
| 66 | 351–358 | G.IPVVPGAG.I                      | 35.6  | 0.00028  | −1.98 | 355.2151 | 708.4156  | 708.417   |
| 67 | 364–372 | A.VPGVVSPEA.A                     | 14.15 | 0.044    | 0.12  | 427.7346 | 853.4547  | 853.4545  |
| 68 | 374–395 | A.AKAAKAAKYGARPGVGVGGIP.T         | 17.7  | 0.017    | −0.44 | 507.2941 | 2025.1474 | 2025.1483 |
| 69 | 384–398 | Y.GARPGVGVGGIPTYG.V               | 28.68 | 0.0026   | −2.28 | 679.3632 | 1356.7119 | 1356.715  |
| 70 | 399–407 | G.VGAGGFPGF.G                     | 32.73 | 0.00053  | 0.50  | 404.7033 | 807.392   | 807.3916  |
| 71 | 399–419 | G.VGAGGFPGFVGVGGIPGVAG.V          | 22.47 | 0.014    | −0.75 | 864.9564 | 1727.8983 | 1727.8996 |
| 72 | 472–482 | F.GLVPGVGVAPG.V                   | 29.64 | 0.0013   | −0.54 | 461.7712 | 921.5279  | 921.5284  |
| 73 | 472–497 | F.GLVPGVGVAPGVGVAPGVGVAPGVGL.A    | 25.33 | 0.0029   | 0.00  | 718.0878 | 2151.2417 | 2151.2417 |
| 74 | 473–481 | G.LVPGVGVAP.G                     | 20.23 | 0.0095   | 0.25  | 404.7501 | 807.4857  | 807.4855  |
| 75 | 480–489 | V.APGVGVAPGV.G                    | 19.73 | 0.02     | −0.97 | 412.2369 | 822.4592  | 822.46    |
| 76 | 486–495 | V.APGVGVAPGV.G                    | 19.73 | 0.02     | −0.97 | 412.2369 | 822.4592  | 822.46    |
| 77 | 498–507 | L.APGVGVAPGV.G                    | 19.73 | 0.02     | −0.97 | 412.2369 | 822.4592  | 822.46    |
| 78 | 504–513 | V.APGVGVAPGV.G                    | 19.73 | 0.02     | −0.97 | 412.2369 | 822.4592  | 822.46    |
| 79 | 495–511 | G.VGLAPGVGVAPGVGVAP.G             | 19.57 | 0.011    | −0.85 | 708.9135 | 1415.8125 | 1415.8137 |
| 80 | 498–526 | L.APGVGVAPGVGVAPGVGVAPGIGPGGVAA.A | 62.32 | 9.70E-07 | −1.21 | 769.7646 | 2306.2719 | 2306.2747 |
| 81 | 597–625 | G.AAVPGVLGGLGALGGVIGPGVVVAGPAA.A  | 42.08 | 7.40E-05 | 0.04  | 771.1093 | 2310.3061 | 2310.306  |
| 82 | 679–695 | G.AAGLGGVLGGAGQFPLG.G             | 16.55 | 0.031    | −0.62 | 721.3931 | 1440.7716 | 1440.7725 |
| 83 | 697–703 | G.VAARPGF.G                       | 14.32 | 0.037    | 1.40  | 359.2063 | 716.398   | 716.397   |
| 84 | 704–713 | F.GLSPIFPGGA.C                    | 53.48 | 5.40E-06 | 0.11  | 458.2504 | 914.4862  | 914.4862  |
| 85 | 704–712 | F.GLSPIFPGG.A                     | 41.47 | 0.00012  | −0.24 | 422.7317 | 843.4489  | 843.4491  |



**Table S2.** *Cont.*

|    |         |              |       |          |       |          |          |          |
|----|---------|--------------|-------|----------|-------|----------|----------|----------|
| 86 | 704–710 | F.GLSPIFP.G  | 34.6  | 0.00068  | 0.27  | 365.7104 | 729.4063 | 729.4061 |
| 87 | 705–712 | G.LSPIFPGG.A | 43.41 | 6.80E-05 | −0.89 | 394.2207 | 786.4269 | 786.4276 |
| 88 | 705–711 | G.LSPIFPG.G  | 18.34 | 0.024    | −0.14 | 365.7103 | 729.406  | 729.4061 |

<sup>b</sup>The sequence of each peptide was determined by high resolution LC/MS analysis and MASCOT MS/MS Ion Research tools. The sequences in red are those appearing repeatedly in human tropoelastin.

© 2015 by the authors; licensee MDPI, Basel, Switzerland. This article is an open access article distributed under the terms and conditions of the Creative Commons Attribution license (<http://creativecommons.org/licenses/by/4.0/>).
